# Supplementary material for: Effects of sister chromatid cohesion proteins oncutgene expression during wing development inDrosophila
Source: Oxford University Press journal article supplement (doi:10.1242/dev.02064), 2005-10-06
Supplement: dev02064-sup-figs1.pdf [file dev02064-sup-figs1.pdf]

5'AATCAGCTGAAATGTAATCATGTACTAATCTGCGAAGAGTCTGGCCACACTTCCAAAAACCTCT  
GGCAACGCTTCGTGCGTGGATTAATGGCGTGCCCATGATGAAATAACATATTGTACATACATCTTG  
TCTCGTATGTTCTCCGAAAAGGACTCGCAACTAGCGAAAAAGTACCCCAACCTGTTGAAAATCTTC  
TTTGGGCGCTTCTGCGACATACCGAACCAGTTTCGCATCAAGTGTGTTTCAGTCATCCATGCACTTC  
CTGCTCAATCACCCAAGTCTTCAG3'
