# Supplementary material for: Effects of sister chromatid cohesion proteins oncutgene expression during wing development inDrosophila
Source: Oxford University Press journal article supplement (doi:10.1242/dev.02064), 2005-10-06
Supplement: dev02064supptables.pdf [file dev02064supptables.pdf]

**Table S1. PCR primers for chromatin immunoprecipitation analysis of cohesin binding to the *cut* gene**

| Amplicon    | Forward primer                      | Reverse primer                     |
|-------------|-------------------------------------|------------------------------------|
| Amplicon 1  | 5'-TGT'TTATTGGT'TCCACAT'TACGCC-3'   | 5'-TCATT'TGTTTTCATTGTTGCTCGG-3'    |
| Amplicon 2  | 5'-AGCC'FCAATACC'CAATGAT'ACCACC-3'  | 5'-CCTGAGT'TGTGTGCTAATGTCCCTG-3'   |
| Amplicon 3  | 5'-TTCTT'GATAGCT'TGGTAGGAAGACG-3'   | 5'-AAGGAGT'TGCTT'GAGT'TCTTGTATG-3' |
| Amplicon 4  | 5'-TCGAT'CAGGCAGAGGGT'TATG-3'       | 5'-GGCGCTG'TAAGT'TGGCGC-3'         |
| Amplicon 5  | 5'-CACTA'AGAGGGAACTAT'GAGCAGC-3'    | 5'-GATAAAC'GACAACAGCAACAT'FCG-3'   |
| Amplicon 6  | 5'-TGGT'TACCCCTT'AAATGGAGAGC-3'     | 5'-ATGTG'TGAGGTCTT'ACGGTAGCTG-3'   |
| Amplicon 7  | 5'-AAAT'CATCGGCT'FCAGGTGG-3'        | 5'-GGCTG'TGGCTTCTGTTT'GCG-3'       |
| Amplicon 8  | 5'-CACT'CCACTCCACT'FGGCT'FAGG-3'    | 5'-TGAT'CGTGGGGT'GAGAGAGC-3'       |
| Amplicon 9  | 5'-CAGAT'CCAAGCCAAAAC'CCGAG-3'      | 5'-CCAGC'AGTTAAACGAGGAAAAGAG-3'    |
| Amplicon 10 | 5'-GGGCA'ACTT'AGTATCCAGCAAAAAC-3'   | 5'-GCAAC'ATGATCCATCTCTGTATGG-3'    |
| Amplicon 11 | 5'-CGAAT'CGGAAT'CGGAGTGAC-3'        | 5'-TGGAT'GATGACTAT'TTCTGCGC-3'     |
| Amplicon 12 | 5'-GTAGAA'CCCGCAGTGAATCTAATCC-3'    | 5'-GCCCT'TTTTGTTGGCTTATTTGTC-3'    |
| Amplicon 13 | 5'-CAAGAAA'AAAGATGGTGGT'GGAAG-3'    | 5'-TTGTT'GTGGCTCAAGAGTGGG-3'       |
| Amplicon 14 | 5'-TGCGAT'GGTATCGTATCCGTATG-3'      | 5'-CGGCA'AGTGTGGGAT'TTAAAG-3'      |
| Amplicon 15 | 5'-GGCTGGG'GAATAGAAA'CTACACTG-3'    | 5'-GC'TAATGAGGTGTGCC'CGTAAC-3'     |
| Amplicon 16 | 5'-TGTGC'CTGGACAGATGAGT'GTG-3'      | 5'-TTGAT'GTTTATCGGACTATCGGTG-3'    |
| Amplicon 17 | 5'-CGTAAG'CGTATAAT'FCGTTTAGCG-3'    | 5'-TGGT'GGTGGTGTGAAGTGGC-3'        |
| Amplicon 18 | 5'-AATTAC'GAGATTGCC'AGCGG-3'        | 5'-GCCCA'CCTTGTCACAATTCG-3'        |
| Amplicon 19 | 5'-CTGGA'AAAT'ATGAAATATGCAAC'GTG-3' | 5'-TAGT'GTTGGCTACCGACCTGG-3'       |
| Amplicon 20 | 5'-AACAT'AAAAAACCAATACCACAT'GGC-3'  | 5'-GCGAC'TGCATTTGCTACCTTG-3'       |
| Amplicon 21 | 5'-AGGAA'ATCGTAGACGCTTCAC-3'        | 5'-GGTTC'GTTTCTCGGCTCCTG-3'        |
| Amplicon 22 | 5'-GGTCA'CTT'AAATCCAAAC'CCATAG-3'   | 5'-GAAT'CGGTTTCGTAAAT'FGACTTCC-3'  |
| Amplicon 23 | 5'-AATGA'CACTCGAAGCGACAGG-3'        | 5'-TGAAG'CATCTGGAGCAACT'CATC-3'    |
| Amplicon 24 | 5'-TTCTC'CTGGGTTGTAAAA'AGGAC-3'     | 5'-CGACA'GACGGGACACTTGG-3'         |
| Amplicon 25 | 5'-CCTGG'TCAGGTGGAGAA'TAACAC-3'     | 5'-CGACG'CCGCAACATTTGTG-3'         |
| Amplicon 26 | 5'-CACAT'GAAAGATCGCGACGG-3'         | 5'-CACGT'CTGCAACGGAAC'TTATTAG-3'   |
| Amplicon 27 | 5'-ACCGC'TCGGCTCTTGT'TTAG-3'        | 5'-GCGTC'AGTCGAGTTTATATACG-3'      |
| Amplicon 28 | 5'-TTTAG'GCCGAATCGGGTC-3'           | 5'-TCCAC'CGCAACTCTCTCAGAAG-3'      |
| Amplicon 29 | 5'-CCAAA'CCAAAACCAAAACCGG-3'        | 5'-GAGAT'TTGCCATAGTCGAATCAATC-3'   |
| Amplicon 30 | 5'-TTTTT'CTTTCAGTGTGTGCCG-3'        | 5'-TGACA'GGTGTGACAGGTGATG-3'       |
| Amplicon 31 | 5'-ACACT'CTGGTGACCCCAAC-3'          | 5'-CATT'TTTGCTTTCGTGCTATCTG-3'     |
| Amplicon 32 | 5'-TCGC'TTCACTTGTGGACCAAC-3'        | 5'-ACTT'GGCAGCATTAATTAACCG-3'      |
| Amplicon 33 | 5'-TCGCC'TCAACAATTCATCCATAG-3'      | 5'-TGGCA'GCATTCGAGCGAC-3'          |
| Amplicon 34 | 5'-GCCAG'CGGTTGTAACACAG-3'          | 5'-GAGCC'ACCAAGGACATCATATC-3'      |
| Amplicon 35 | 5'-GGACG'GAGGAGGCATGTTTC-3'         | 5'-TCGTG'CTGTAAGTCACTATCAAAAC-3'   |
| Amplicon 36 | 5'-AAGAA'TGCCAGAGATACGAGGAG-3'      | 5'-AAGGA'TTCGATACGTTTGC-3'         |
| Amplicon 37 | 5'-CGGT'CCTGGGTTACTTCTTAGGG-3'      | 5'-TTACC'AGTTTATCATTGGCAGTCTC-3'   |
| Amplicon 38 | 5'-TTACT'CCATCTGGCTTAACCCAC-3'      | 5'-TTCGG'TCAGTGTAGTTAGACGAACG-3'   |
| Amplicon 39 | 5'-TGCAC'CGCTTCGATGCTC-3'           | 5'-CTTTA'ATAGGCAACAGCCAGACG-3'     |
| Amplicon 40 | 5'-CGT'TTATACGAGTATGGCGCTTG-3'      | 5'-ACCT'TATTCCACATAGAACCCGAC-3'    |
| Amplicon 41 | 5'-CCAGA'GCTT'GAGCCACATAAAAC-3'     | 5'-CCCAG'CGTTCCTCCACAG-3'          |
| Amplicon 42 | 5'-TGCTG'CTGTGTTGTTGTTATTTG-3'      | 5'-GCCTC'GTTCAGCCTCTATCTC-3'       |
| Amplicon 43 | 5'-CCATT'CGATCCCATTCGATTG-3'        | 5'-TTCA'GGTGGTACAGGTGGC-3'         |
| Amplicon 44 | 5'-ATACT'ATACGTTGGCCTCTTCC-3'       | 5'-TTAA'TAGACATTTCCGAATAACCCG-3'   |
| Amplicon 45 | 5'-CGCAA'TAAAGACAATGGGAAGG-3'       | 5'-AGCTA'CCGCCACAAAATGAGAG-3'      |
| Amplicon 46 | 5'-GGCT'TTGTATTGGCTTTGATAAC-3'      | 5'-GCTT'GATTTTTGACAAGTAGCAGC-3'    |
| Amplicon 47 | 5'-GCTGT'GCTGATGCTCGCG-3'           | 5'-CGGT'CCTCCTCTCTCTGTCFC-3'       |
| Amplicon 48 | 5'-ATTC'TTGAAGACCATCTATCC-3'        | 5'-CACC'A'CTCGTTTCATATTGTGTG-3'    |
| Amplicon 49 | 5'-AAGCT'TTTCGCTCACCACC-3'          | 5'-TCAGT'ATCCACGGCTTGTGCTAG-3'     |
| Amplicon 50 | 5'-TGCAAT'CAAAGCAAACACTA'CTCC-3'    | 5'-ACATC'ATCGTTGAAAAGGTGGG-3'      |
| Amplicon 51 | 5'-AAAAA'AGGGTGAGGATTTCTGCTC-3'     | 5'-AAGTA'GGCAACGTAACGTACCG-3'      |
| Amplicon 52 | 5'-CCAGT'CAAGTTTTCAGACTTCAGG-3'     | 5'-CCCC'TTTATCCCTCTGGCG-3'         |
| Amplicon 53 | 5'-TTCTA'GAAAATTTGGTCTCA'GGC-3'     | 5'-TTCGG'TTATTTGGTCTCTGTATGC-3'    |
| Amplicon 54 | 5'-CCCGC'CGCAAAGTACACAC-3'          | 5'-TGTCA'ACTACGAACGAACAACAG-3'     |
| Amplicon 55 | 5'-TGCCCT'GATGGTTTCTGCGC-3'         | 5'-ATACA'TATAGTTGCCCTTGGACCG-3'    |
| Amplicon 56 | 5'-ACAGG'CAAACAAAATATCCCGC-3'       | 5'-TCGCA'GGCAAATATGTGGAAC-3'       |
| Amplicon 57 | 5'-CCAAA'AGGCCACCCACCG-3'           | 5'-GCCCG'AGCTCTCAAAAGTC-3'         |
| Amplicon 58 | 5'-GAATT'GAACAAAACGGATGCAAG-3'      | 5'-GCACT'GTGTGTGCTGTGGGC-3'        |
| Amplicon 59 | 5'-TTCC'TTTAGATCCAAAACACT'TTGC-3'   | 5'-TTCGA'AAATCCCATGAAAAGAC-3'      |
| Amplicon 60 | 5'-CAGT'CCGCTTTGGATGTG-3'           | 5'-CCTCT'CAAAGAAGGAAACATTTGGT-3'   |
| Amplicon 61 | 5'-AATGCC'AACTTCCGAAAAGACG-3'       | 5'-AACAA'CCAAAAGACAACACAGAG-3'     |
| Amplicon 62 | 5'-GAGCG'TGGTGAAGAAATTTCCAG-3'      | 5'-CCTAA'CTTTTGGTTCAGCTTCGAG-3'    |
| Amplicon 63 | 5'-AAAA'CAAAGTGGGGAAATCC-3'         | 5'-AGGCA'GAGTAAACATCCGC-3'         |
| Amplicon 64 | 5'-TCGGA'ATCGACTACTAAGAGCTACG-3'    | 5'-TGCCA'CTGGAGACGAAATGC-3'        |
| Amplicon 65 | 5'-GCTCT'GTCTGTCTTCTCTGTGTG-3'      | 5'-TCCAC'TCGTAAAGATTTCTTGTGG-3'    |
| Amplicon 66 | 5'-TAAAT'ATCGCCCAAGGAAAACG-3'       | 5'-TTGCA'TGTGAGAACTCATTCGC-3'      |
| Amplicon 67 | 5'-CGT'TGGACAGACGAAAAACGG-3'        | 5'-GGT'TGCATTTTATCCCTAAGATTG-3'    |
| Amplicon 68 | 5'-TTTGG'TTGTCTAAAGAGTGGAAAGT-3'    | 5'-AATGT'GACGTTTGGCTATTTGC-3'      |
| Amplicon 69 | 5'-ATCTC'GTGTGTGACCATCAAGT-3'       | 5'-TGCT'TCCTTCTTCTACCCG-3'         |
| Amplicon 70 | 5'-GCAGAT'TAAATCAGCGAGTGGC-3'       | 5'-AAGGC'TGTCATGGAACGAATACC-3'     |
| Amplicon 71 | 5'-TGAGAT'ACAAAATGGGCAAAAAGG-3'     | 5'-CGAAA'AGCAAAACAGGACAGC-3'       |
| Amplicon 72 | 5'-TGGT'TTCTTTATGCTAATGTCTCG-3'     | 5'-TTAAT'GATGCCGCTGACAAGTG-3'      |
| Amplicon 73 | 5'-GAACG'ATCAAAGTCTGAGCGGAC-3'      | 5'-TTGG'TTTCGTTTGGTGTGTG-3'        |
| Amplicon 74 | 5'-CGCT'TAGAGGTTTGTATCTCATGG-3'     | 5'-GCTAC'GCAATTGACACGCTCAG-3'      |
| Amplicon 75 | 5'-AGATC'ACGCTTTCAAAACAATTC-3'      | 5'-GATAG'CTCGAAACAGACAGAAGC-3'     |
| Amplicon 76 | 5'-TAGGA'AGTGGAAAGTGGGATGG-3'       | 5'-CCTT'GCTCAATTA'CTCGCCTC-3'      |
| Amplicon 77 | 5'-GCAGC'AAACAGCCAAAGGTC-3'         | 5'-TCGTG'CCCTTTTATTTCTTGGC-3'      |
| Amplicon 78 | 5'-AGAGC'ATCATCGGCACCTG-3'          | 5'-CACTC'ATTTTCGCACCTATTCTC-3'     |
| Amplicon 79 | 5'-GAGTA'TGTGTGTTGTCCATTGACG-3'     | 5'-GCAGT'AGCAGAGGGCAAGAGAC-3'      |
| Amplicon 80 | 5'-TTTT'CGACTCAAAGACAGGAGAGC-3'     | 5'-CATTG'AAAGCCCTTACAATCCG-3'      |
| Amplicon 81 | 5'-GGCGT'CTGCATTGCATTTG-3'          | 5'-GGCTG'CTCTGTTCGGCTCTC-3'        |
| Amplicon 82 | 5'-CAAAA'GAATGAATCTCGCTTGC-3'       | 5'-TGCTG'TGTGTTTACACTTGCAC-3'      |
| Amplicon 83 | 5'-TTAGC'AAAACAGATGAAAACCG-3'       | 5'-AACGT'AAGACTGTTTGTCAATGCC-3'    |
| Amplicon 84 | 5'-AGGCG'GCAAAAATAACATTAGAGG-3'     | 5'-CACGA'TCAATCGAAGAAGAACTCC-3'    |
| Amplicon 85 | 5'-AAGACA'AAAAGAGAGAACCCAAAG-3'     | 5'-AGCA'CAAAATCAATGCAAAAACCTC-3'   |

**Table S2. Primers for PCR analysis of *pds5* genomic DNA**

| Primer    | Sequence                       |
|-----------|--------------------------------|
| pds5ex3F  | 5'-ATGTGTTTCGAACTGGAGGA-3'     |
| pds5ex4F  | 5'-ACTAAAACGGGCGATGCTCT-3'     |
| pds5ex4R  | 5'-CATTTTGATGGTGGACTC-3'       |
| pds5ex5F  | 5'-GCTCTGGTCATGGATAAGCC-3'     |
| pds5ex5FA | 5'-AAACTGCTGTCCACGGACGATG-3'   |
| pds5ex5R  | 5'-TTAGCCTCTCAGCATCGTCCG-3'    |
| pds5ex5RA | 5'-TGTGTTTGGCTTATCCATGAC-3'    |
| pds5ex5RB | 5'-CTTATCCATGACCAGAGCAGC-3'    |
| pds5ex6F  | 5'-ACTCTCTGTCTCGTATGTTCTC-3'   |
| pds5ex6FA | 5'-AGTCATCCATGCACTTCCTGCT-3'   |
| pds5ex6FB | 5'-GAGGTGGTAATGGCTATTTGTGG-3'  |
| pds5ex6FC | 5'-AGGGATGCGATGAATGGTCT-3'     |
| pds5ex6FD | 5'-AAGAGCGCATGAAGAAGCTATATC-3' |
| pds5ex6FE | 5'-AAGAACCAATGAAGACACGCAA-3'   |
| pds5ex6R  | 5'-ATTGAGCAGGAAGTGCATGG-3'     |
| pds5ex6RA | 5'-GATGACTGAACACACTTGATGC-3'   |
| pds5ex7R  | 5'-GCTAAACTGGGTTAGGTACTCTG-3'  |
| pds5ex7RA | 5'-AGCACACTCCCGACAGCTTAC-3'    |
| pds5upA   | 5'-CAGCTGAAATGCAATCATGTACT-3'  |
| pds5upB   | 5'-GTCAATGCTAATCAGTGAA-3'      |
